# Supplementary material for: C-Reactive Protein (CRP) Levels in Immune Checkpoint Inhibitor Response and Progression in Advanced Non-Small Cell Lung Cancer: A Bi-Center Study
Source: Cancers (Basel). 2020 Aug 17;12(8):2319. doi: 10.3390/cancers12082319 (PMC7464328; doi:10.3390/cancers12082319)
Supplement: Supplementary file 1 [file cancers-12-02319-s001.pdf]

## Article

# C-Reactive Protein (CRP) Levels in Immune Checkpoint Inhibitor Response and Progression in Advanced Non-Small Cell Lung Cancer: A Bi-Center Study

Jakob M. Riedl, Dominik A. Barth, Wolfgang M. Brueckl, Gloria Zeitler, Vasile Foris, Stefanie Mollnar, Michael Stotz, Christopher H. Rossmann, Angelika Terbuch, Marija Balic, Tobias Niedrist, Thomas Bertsch, Herbert Stoeger, Martin Pichler, Horst Olschewski, Gudrun Absenger, Joachim H. Ficker, Armin Gerger and Florian Posch

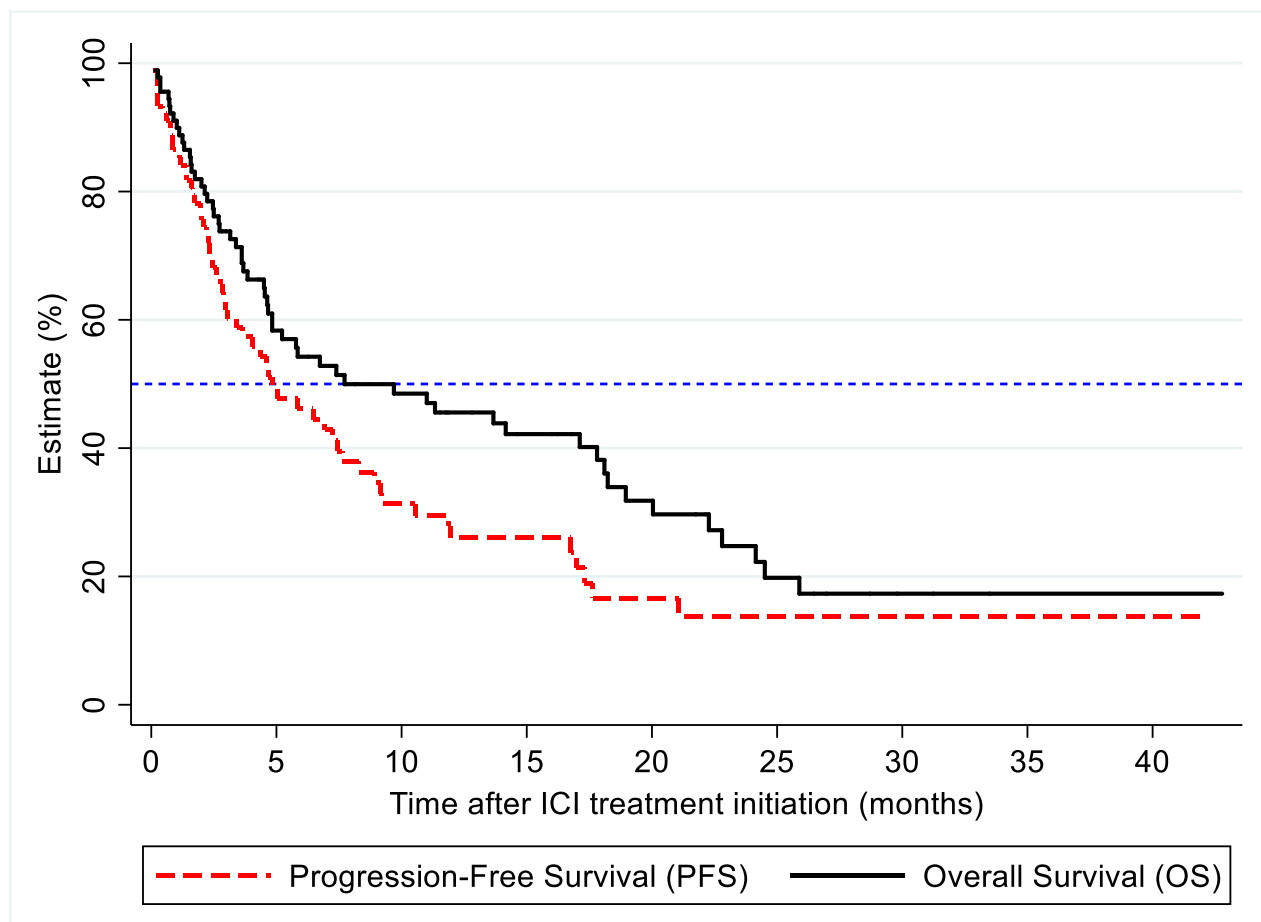

**Figure S1.** Progression-free and overall survival experience of the Graz cohort. Curves were estimated with Kaplan-Meier estimators. Blue dashed line helps to identify median PFS and OS.

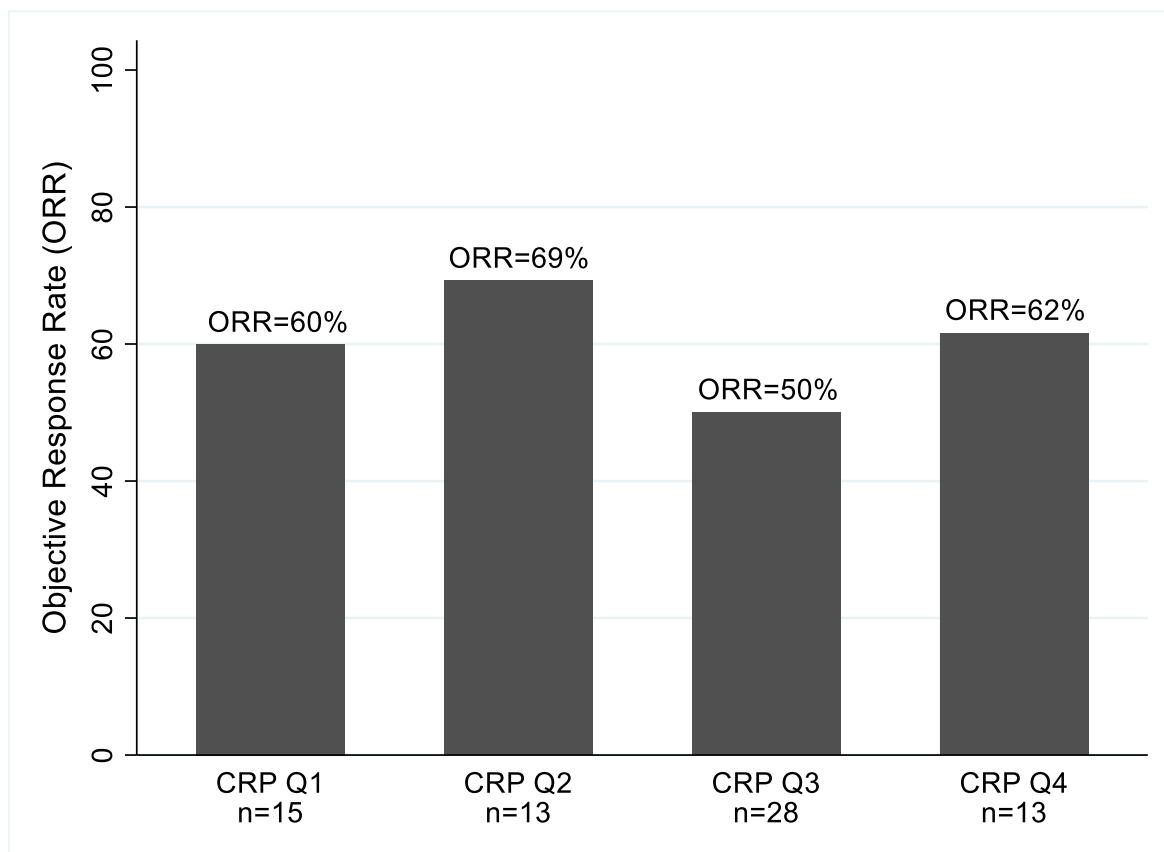

**Figure S2.** External validation of baseline CRP as a predictor of ICI therapy objective response rate in the Nuremberg cohort ( $n = 69$ ). Data are only for patients with observed baseline CRP and a response assessment other than NE (not evaluated). CRP quartile cut-offs were taken from the Graz cohort. Thus, numbers of patients in the CRP quartiles are not balanced. CRP quartile cut-offs were as follows: Q1: CRP  $\leq 7.7$  mg/L, Q2: CRP  $> 7.7$  mg/L but  $\leq 21.6$  mg/L, Q3: CRP  $> 21.6$  mg/L but  $\leq 66.1$  mg/L, and Q4: CRP  $> 66.1$  mg/L. Abbreviations: ORR—Objective response rate, CRP—C-reactive protein, Q—Quartile.

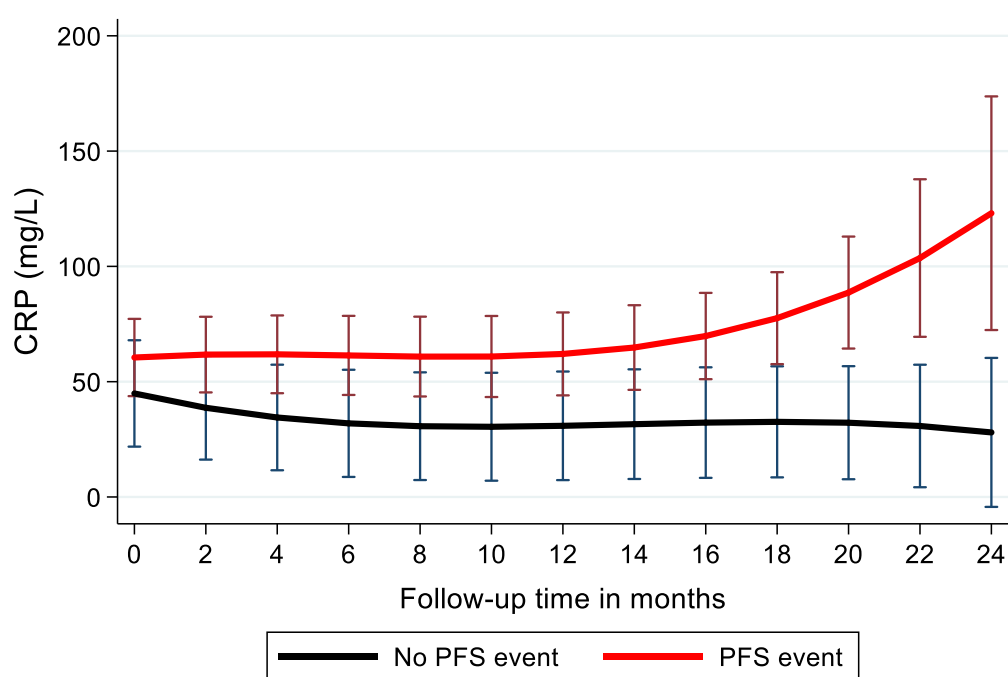

**Figure S3.** Margins plot of average CRP trajectories in patients who did (red line) and did not (black line) develop a PFS event during follow-up. Data are from a mixed model allowing for interactions between PFS status and linear, quadratic, and cubic follow-up time. This analysis does not account for (potentially informative) censoring. Range bars represent 95% confidence bands. Abbreviations: CRP—C-reactive protein, PFS—Progression-free survival.

**Table 1.** ICI therapy response categories in the Graz and Nuremberg cohort. Data are absolute counts (%). The response categories were assessed by treating physicians in analogy to immune-related response evaluation criteria in solid tumors (irRECIST) but do not constitute formal radiographic responses assessed by an independent trial radiologist. Most patients who were not evaluated (NE) had disease progression / died before radiographic response assessment.

| Physician-assessed radiographic response category | Graz: n (%) | Nuremberg: n (%) |
|---------------------------------------------------|-------------|------------------|
| Complete remission (CR)                           | 2 (2%)      | 0 (0%)           |
| Partial remission (PR)                            | 16 (18%)    | 40 (40%)         |
| Stable disease (SD)                               | 25 (28%)    | 11 (11%)         |
| Progressive disease (PD)                          | 31 (34%)    | 18 (18%)         |
| Not evaluated (NE)                                | 16 (18%)    | 32 (32%)         |

**Table S2.** Baseline characteristics in the Graz cohort in patients with available baseline CRP ( $n = 85$ )—Distribution overall and by CRP level. For this tabulation, CRP was dichotomized into a binary variable using an empirical cut-off at the 75<sup>th</sup> percentile of its distribution (Q3, 66.1 mg/L). Data are medians (25<sup>th</sup>–75<sup>th</sup> percentile) for continuous data, and absolute frequencies (%) for count data. n (%miss.) reports the number of patients with fully observed data for the respective variable (% missing). \*  $p$ -values are from rank-sum tests, Fisher’s exact tests, and  $\chi^2$ -tests, as appropriate. \*\* Variables in the section “Treatment prior ICI” are with  $n = 32$  patients, and the missingness percentage was consequently scaled to 100% for  $n = 32$ . Abbreviations: CRP—C-reactive protein, ICI—Immune checkpoint inhibitor, BMI—Body mass index, ECOG—Eastern Cooperation Oncology Group performance status, NSCLC—Non-small cell lung cancer, EGFR—Epidermal growth factor receptor, EML4-ALK—Echinoderm microtubule associated protein-like 4 anaplastic lymphoma kinase, ROS1—ROS proto-oncogene 1, BRAF—v-Raf murine sarcoma viral oncogene homolog B, PD-L1—programmed death ligand 1, RTx—Radiotherapy, CTx—Chemotherapy, RCTx—Chemoradiation.

| Variable                                              | n<br>(%<br>miss.) | Overall<br>( $n = 85$ ) | Baseline CRP<br>$\leq 66.1$ mg/L<br>(i.e. Q3, $n = 4$ ) | Baseline CRP<br>$> 66.1$ mg/L<br>(i.e. Q3, $n = 21$ ) | $p^*$        |
|-------------------------------------------------------|-------------------|-------------------------|---------------------------------------------------------|-------------------------------------------------------|--------------|
| <b>Demographic characteristics</b>                    |                   |                         |                                                         |                                                       |              |
| Age at ICI initiation (years)                         | 85 (0%)           | 67 (59–74)              | 68 (60–74)                                              | 61 (52–75)                                            | 0.196        |
| Female Gender                                         | 85 (0%)           | 40 (47%)                | 32 (50%)                                                | 8 (38%)                                               | 0.343        |
| BMI at ICI initiation (kg/m <sup>2</sup> )            | 80 (6%)           | 24.2 (20.9–27.5)        | 24.2 (21.0–27.3)                                        | 25.2 (20.7–27.8)                                      | 0.892        |
| Charlson comorbidity index at ICI initiation (points) | 85 (0%)           | 8 (5–9)                 | 8 (5–9)                                                 | 7 (6–9)                                               | 0.992        |
| Past or present smoker                                | 82 (4%)           | 64 (78%)                | 48 (79%)                                                | 16 (76%)                                              | 0.811        |
| ECOG at ICI initiation (points)                       | 57<br>(33%)       | 0 (0–1)                 | 0 (0–1)                                                 | 1 (0–1)                                               | 0.555        |
| Second primary malignancy at any time                 | 81 (5%)           | 18 (22%)                | 18 (30%)                                                | 0 (0%)                                                | <b>0.004</b> |
| <b>Tumor variables</b>                                |                   |                         |                                                         |                                                       |              |
| Adenocarcinoma                                        | 85 (0%)           | 60 (71%)                | 48 (75%)                                                | 12 (57%)                                              | 0.119        |
| Stage IV at initial NSCLC diagnosis                   | 85 (0%)           | 52 (61%)                | 36 (56%)                                                | 16 (76%)                                              | 0.104        |
| EGFR mutation                                         | 69<br>(19%)       | 2 (3%)                  | 1 (2%)                                                  | 1 (6%)                                                | 0.435        |

|                                                                 |             |           |           |           |                   |
|-----------------------------------------------------------------|-------------|-----------|-----------|-----------|-------------------|
| EML4-ALK rearrangement                                          | 69<br>(19%) | 1 (1%)    | 1 (2%)    | 0 (0%)    | 0.999             |
| ROS1 overexpression                                             | 57<br>(33%) | 0 (0%)    | 0 (0%)    | 0 (0%)    | N/A               |
| BRAF mutation                                                   | 21<br>(75%) | 2 (10%)   | 1 (7%)    | 1 (14%)   | 0.999             |
| PD-L1 expression (%)                                            | 65<br>(24%) | 40 (1–80) | 50 (1–80) | 20 (1–80) | 0.662             |
| <b>Treatment prior ICI</b>                                      |             |           |           |           |                   |
| Primary treatment intent: curative**                            | 85 (0%)     | 30 (35%)  | 25 (39%)  | 5 (24%)   | 0.204             |
| ---Any neoadjuvant therapy (RTx, CTx, RCTx)                     | 30 (0%)     | 8 (27%)   | 7 (28%)   | 1 (20%)   | 0.712             |
| ---Any definitive RCTx                                          | 30 (0%)     | 6 (20%)   | 5 (20%)   | 1 (20%)   | 0.999             |
| ---Any curative surgery                                         | 30 (0%)     | 21 (70%)  | 17 (68%)  | 4 (80%)   | 0.999             |
| ---Any adjuvant therapy (CTx, RTx)                              | 30 (0%)     | 11 (37%)  | 7 (28%)   | 4 (80%)   | <b>0.047</b>      |
| <b>ICI treatment variables</b>                                  |             |           |           |           |                   |
| ICI treatment line                                              | 85 (0%)     | /         | /         | /         | 0.812             |
| ---1 <sup>st</sup> -line                                        | /           | 35 (41%)  | 25 (39%)  | 10 (48%)  | /                 |
| ---2 <sup>nd</sup> -line                                        | /           | 42 (49%)  | 33 (52%)  | 9 (43%)   | /                 |
| ---3 <sup>rd</sup> , 4 <sup>th</sup> , or 5 <sup>th</sup> -line | /           | 8 (9%)    | 6 (9%)    | 2 (10%)   | /                 |
| ICI agent                                                       | 85 (0%)     | /         | /         | /         | 0.198             |
| ---Nivolumab                                                    | /           | 48 (56%)  | 38 (59%)  | 10 (48%)  | /                 |
| ---Pembrolizumab                                                | /           | 34 (40%)  | 25 (39%)  | 9 (43%)   | /                 |
| ---Atezolizumab                                                 | /           | 3 (3%)    | 1 (2%)    | 2 (10%)   | /                 |
| Number of ICI cycles                                            | 76<br>(11%) | 5 (2–15)  | 7 (4–19)  | 2 (1–3)   | <b>&lt;0.0001</b> |

**Table 3. Multivariable models for objective response rate, progression-free and overall survival in the Graz cohort.** Data are from multivariable Cox proportional hazards regression models. Variables for multivariable adjustment were selected based on a significant univariable association with the outcome (Table 2). Baseline CRP is specified as a log2-transformed variable. Abbreviations: PFS—Progression-free survival, OS—Overall survival, HR—Hazard ratio, 95%CI—95% confidence interval (Wald test p-value), CRP—C-reactive protein, ICI—Immune-checkpoint inhibitor, N/A—Not applicable, Ref.—Reference category.

| Variable                                         | Multivariable Model #1:<br>ORR |                                  | Multivariable Model #2:<br>PFS |                                   | Multivariable Model #3:<br>OS |                                   |
|--------------------------------------------------|--------------------------------|----------------------------------|--------------------------------|-----------------------------------|-------------------------------|-----------------------------------|
|                                                  | Adjusted HR                    | 95%CI (p)                        | Adjusted HR                    | 95%CI (p)                         | Adjusted HR                   | 95%CI (p)                         |
| Baseline CRP (per doubling)                      | 0.66                           | 0.47–0.91<br>( <i>p</i> = 0.011) | 1.37                           | 1.16–1.63<br>( <i>p</i> < 0.0001) | 1.42                          | 1.18–1.71<br>( <i>p</i> < 0.0001) |
| Age (per 10 years increase)                      | 2.45                           | 1.11–5.40<br>( <i>p</i> = 0.026) | 0.78                           | 0.63–0.95<br>( <i>p</i> = 0.014)  | 0.69                          | 0.55–0.87<br>( <i>p</i> = 0.002)  |
| Stage IV at initial diagnosis                    | N/A                            | N/A                              | 1.65                           | 0.92–2.97<br>( <i>p</i> = 0.094)  | 1.56                          | 0.83–2.96<br>( <i>p</i> = 0.170)  |
| Female Gender                                    | N/A                            | N/A                              | N/A                            | N/A                               | 0.45                          | 0.25–0.80<br>( <i>p</i> = 0.007)  |
| Line of ICI therapy:<br>---1 <sup>st</sup> -line | N/A                            | N/A                              | N/A                            | N/A                               | Ref.                          | Ref.                              |
| ---2 <sup>nd</sup> -line                         | N/A                            | N/A                              | N/A                            | N/A                               | 2.37                          | 1.20–4.66<br>( <i>p</i> = 0.013)  |
| ---3 <sup>rd</sup> or later line                 | N/A                            | N/A                              | N/A                            | N/A                               | 2.35                          | 0.87–6.36                         |

(p=0.093)

**Table 4.** Multivariable model for objective response rate, progression-free and overall survival in the Graz cohort adjusted for NLR, LDH and LIPI Score. Data are from multivariable Cox proportional hazards regression models. Abbreviations: PFS—Progression-free survival, OS—Overall survival, HR—Hazard ratio, 95%CI—95% confidence interval (Wald test *p*-value), CRP—C-reactive protein, NLR—Neutrophil/Lymphocyte ratio, LDH—lactat dehydrogenase, ICI—Immune-checkpoint inhibitor, N/A—Not applicable, Ref.—Reference category.

| Multi-variable model | Variable       | ORR—Odds Ratio<br>(95%CI, <i>p</i> )  | PFS—Hazard ratio<br>(95%CI, <i>p</i> ) | OS—Hazard ratio<br>(95%, <i>p</i> )   |
|----------------------|----------------|---------------------------------------|----------------------------------------|---------------------------------------|
| #1                   | CRP            | 0.71                                  | 1.40                                   | 1.28                                  |
|                      | (per doubling) | (0.51–0.98, <i>p</i> = 0.036)         | (1.17–1.68, <i>p</i> < 0.0001)         | (1.07–1.53, <i>p</i> = 0.006)         |
| #2                   | NLR            | 1.00                                  | 1.14                                   | 1.30                                  |
|                      | (per doubling) | (0.54–1.83, <i>p</i> = 0.992)         | (0.82–1.59, <i>p</i> = 0.444)          | (0.94–1.80)                           |
| #3                   | CRP            | 0.64                                  | 1.48                                   | 1.40                                  |
|                      | (per doubling) | (0.47–0.89, <i>p</i> = 0.008)         | (1.23–1.77, <i>p</i> < 0.0001)         | (1.18–1.68, <i>p</i> < 0.0001)        |
| #2                   | LDH            | 1.01                                  | 1.19                                   | 1.20                                  |
|                      | (per doubling) | (0.40–2.55, <i>p</i> = 0.975)         | (0.81–1.76, <i>p</i> = 0.373)          | (0.81–1.76, <i>p</i> = 0.368)         |
| #3                   | CRP            | 0.71                                  | 1.44                                   | 1.31                                  |
|                      | (per doubling) | (0.51–0.99, <i>p</i> = 0.041)         | (1.20–1.73, <i>p</i> < 0.0001)         | (1.10–1.57, <i>p</i> = 0.003)         |
| #3                   | LIPI: 0 points | Ref.                                  | Ref.                                   | Ref.                                  |
|                      | ---1 point     | 1.64<br>(0.42–6.44, <i>p</i> = 0.476) | 1.10<br>(0.56–2.16, <i>p</i> = 0.780)  | 1.18<br>(0.57–2.46, <i>p</i> = 0.659) |
| #3                   | ---2 points    | 0.73<br>(0.11–4.97, <i>p</i> = 0.744) | 1.66<br>(0.76–3.62, <i>p</i> = 0.202)  | 2.20<br>(0.95–5.11, <i>p</i> = 0.067) |

**Table 5.** Comparison of the baseline characteristics of the Graz and Nuremberg cohort. Data are for patients with observed baseline CRP (*n* = 85 and *n* = 101). Some data were not available (n/a) in the Nuremberg cohort. Summary measures are medians (25<sup>th</sup>–75<sup>th</sup> percentile) for continuous data, and absolute frequencies (%) for count data. n (%miss.) reports the number of patients with fully observed data for the respective variable (% missing). \*ECOG data in the Nuremberg cohort were not exclusively from ICI initiation but from initiation of 1<sup>st</sup>-line therapy. \*\*Variables in the section “Treatment prior ICI” are with *n* = 30 patients, and the missingness percentage was consequently scaled to 100% for *n* = 30. Abbreviations: CRP—C-reactive protein, ICI—Immune checkpoint inhibitor, n/a – data not available in the Nuremberg cohort, BMI—Body mass index, ECOG—Eastern Cooperation Oncology Group performance status, NSCLC—Non-small cell lung cancer, EGFR—Epidermal growth factor receptor, EML4-ALK—Echinoderm microtubule associated protein-like 4 anaplastic lymphoma kinase, ROS1—ROS proto-oncogene 1, BRAF—v-Raf murine sarcoma viral oncogene homolog B, PD-L1—programmed death ligand 1, RTx—Radiotherapy, CTx—Chemotherapy, RCTx—Chemoradiation.

| Variable                                   | Graz cohort with baseline<br>CRP observed ( <i>n</i> = 85) |                                                                             | Nuremberg cohort with<br>baseline CRP observed ( <i>n</i> = 101) |                                                                                 |
|--------------------------------------------|------------------------------------------------------------|-----------------------------------------------------------------------------|------------------------------------------------------------------|---------------------------------------------------------------------------------|
|                                            | n<br>(%<br>miss.)                                          | Summary<br>measure (25 <sup>th</sup> –75 <sup>th</sup><br>percentile, or %) | n<br>(%<br>miss.)                                                | Summary<br>measure (25 <sup>th</sup> –<br>75 <sup>th</sup> percentile, or<br>%) |
| <b>Demographic characteristics</b>         |                                                            |                                                                             |                                                                  |                                                                                 |
| Age at ICI initiation (years)              | 85 (0%)                                                    | 67 (59–74)                                                                  | 101 (0%)                                                         | 68 (60–74)                                                                      |
| Female Gender                              | 85 (0%)                                                    | 40 (47%)                                                                    | 101 (0%)                                                         | 34 (34%)                                                                        |
| BMI at ICI initiation (kg/m <sup>2</sup> ) | 80 (6%)                                                    | 24.2 (20.9–27.5)                                                            | 0 (100%)                                                         | n/a                                                                             |

|                                                                 |          |                 |          |            |
|-----------------------------------------------------------------|----------|-----------------|----------|------------|
| Charleston comorbidity index at ICI initiation (points)         | 85 (0%)  | 8 (5–9)         | 0 (100%) | n/a        |
| Past or present smoker                                          | 82 (4%)  | 64 (78%)        | 0 (100%) | n/a        |
| ECOG at ICI initiation (points)*                                | 57 (33%) | 0 (0–1)         | 86 (15%) | 0 (0–1)    |
| Second primary malignancy at any time                           | 81 (5%)  | 18 (22%)        | 0 (100%) | n/a        |
| <b>Tumor variables</b>                                          |          |                 |          |            |
| Adenocarcinoma                                                  | 85 (0%)  | 60 (71%)        | 101 (0%) | 59 (58%)   |
| Stage IV at initial NSCLC diagnosis                             | 85 (0%)  | 52 (61%)        | 101 (0%) | 64 (64%)   |
| EGFR mutation                                                   | 69 (19%) | 2 (3%)          | 60 (40%) | 2 (4%)     |
| EML4-ALK rearrangement                                          | 69 (19%) | 1 (1%)          | 60 (40%) | 0 (0%)     |
| ROS1 overexpression                                             | 57 (33%) | 0 (0%)          | 60 (40%) | 0 (0%)     |
| BRAF mutation                                                   | 21 (75%) | 2 (10%)         | 60 (40%) | 1 (2%)     |
| PD-L1 expression (%)                                            | 65 (24%) | 40 (1–80)       | 56 (45%) | 60 (60–90) |
| <b>Treatment prior ICI</b>                                      |          |                 |          |            |
| Primary treatment intent: curative**                            | 85 (0%)  | 30 (35%)        | 101 (0%) | 37 (37%)   |
| ---Any neoadjuvant therapy (RTx, CTx, RCTx)                     | 30 (0%)  | 8 (27%)         | 37 (0%)  | 3 (8%)     |
| ---Any definitive RCTx                                          | 30 (0%)  | 6 (20%)         | 0 (0%)   | 0 (0%)     |
| ---Any curative surgery                                         | 30 (0%)  | 21 (70%)        | 0 (0%)   | 18 (49%)   |
| ---Any adjuvant therapy (CTx, RTx)                              | 30 (0%)  | 11 (37%)        | 0 (0%)   | 4 (11%)    |
| <b>ICI treatment variables</b>                                  |          |                 |          |            |
| ICI treatment line                                              | 85 (0%)  | /               | 101 (0%) | /          |
| ---1 <sup>st</sup> -line                                        | /        | 35 (41%)        | /        | 45 (45%)   |
| ---2 <sup>nd</sup> -line                                        | /        | 42 (49%)        | /        | 41 (41%)   |
| ---3 <sup>rd</sup> , 4 <sup>th</sup> , or 5 <sup>th</sup> -line | /        | 8 (9%)          | /        | 15 (15%)   |
| ICI agent                                                       | 85 (0%)  | /               | 101 (0%) | /          |
| ---Nivolumab                                                    | /        | 48 (56%)        | /        | 55 (54%)   |
| ---Pembrolizumab                                                | /        | 34 (40%)        | /        | 46 (46%)   |
| ---Atezolizumab                                                 | /        | 3 (3%)          | /        | 0 (0%)     |
| ICI in more than 1 treatment line                               | 85 (0%)  | 1 (1%)          | 101 (0%) | 0 (0%)     |
| Number of ICI cycles                                            | 76 (11%) | 5 (2–15)        | 0 (100%) | 7 (3–14)   |
| <b>Laboratory variables</b>                                     |          |                 |          |            |
| CRP at baseline (mg/L)                                          | 85 (6%)  | 21.6 (7.7–66.1) | 101 (0%) | 32 (11–64) |

STROBE Statement—checklist of items that should be included in reports of observational studies.

|                                                                                                    | Item No | Recommendation                                                                                                                                                                                    | Reported on page |
|----------------------------------------------------------------------------------------------------|---------|---------------------------------------------------------------------------------------------------------------------------------------------------------------------------------------------------|------------------|
| Title and abstract                                                                                 | 1       | (a) Indicate the study’s design with a commonly used term in the title or the abstract                                                                                                            | 1,4              |
|                                                                                                    |         | (b) Provide in the abstract an informative and balanced summary of what was done and what was found                                                                                               | 4–5              |
| Introduction                                                                                       |         |                                                                                                                                                                                                   |                  |
| Background/rationale                                                                               | 2       | Explain the scientific background and rationale for the investigation being reported                                                                                                              | 6–7              |
| Objectives                                                                                         | 3       | State specific objectives, including any prespecified hypotheses                                                                                                                                  | 7                |
| Methods                                                                                            |         |                                                                                                                                                                                                   |                  |
| Study design                                                                                       | 4       | Present key elements of study design early in the paper                                                                                                                                           | 8,9              |
| Setting                                                                                            | 5       | Describe the setting, locations, and relevant dates, including periods of recruitment, exposure, follow-up, and data collection                                                                   | 8,9              |
| Participants                                                                                       | 6       | (a) Cohort study—Give the eligibility criteria, and the sources and methods of selection of participants. Describe methods of follow-up                                                           | 8,9              |
|                                                                                                    |         | Case-control study—Give the eligibility criteria, and the sources and methods of case ascertainment and control selection. Give the rationale for the choice of cases and controls                |                  |
|                                                                                                    |         | Cross-sectional study—Give the eligibility criteria, and the sources and methods of selection of participants                                                                                     |                  |
|                                                                                                    |         | (b) Cohort study—For matched studies, give matching criteria and number of exposed and unexposed                                                                                                  | N/A              |
| Case-control study—For matched studies, give matching criteria and the number of controls per case |         |                                                                                                                                                                                                   |                  |
| Variables                                                                                          | 7       | Clearly define all outcomes, exposures, predictors, potential confounders, and effect modifiers. Give diagnostic criteria, if applicable                                                          | 8,9              |
| Data sources/measurement                                                                           | 8*      | For each variable of interest, give sources of data and details of methods of assessment (measurement). Describe comparability of assessment methods if there is more than one group              | 8–11             |
| Bias                                                                                               | 9       | Describe any efforts to address potential sources of bias                                                                                                                                         | 8–11             |
| Study size                                                                                         | 10      | Explain how the study size was arrived at                                                                                                                                                         | 8,9              |
| Quantitative variables                                                                             | 11      | Explain how quantitative variables were handled in the analyses. If applicable, describe which groupings were chosen and why                                                                      | 10–11            |
| Statistical methods                                                                                | 12      | (a) Describe all statistical methods, including those used to control for confounding                                                                                                             | 10–11            |
|                                                                                                    |         | (b) Describe any methods used to examine subgroups and interactions                                                                                                                               | 10–11            |
|                                                                                                    |         | (c) Explain how missing data were addressed                                                                                                                                                       | 10,11,28,29      |
|                                                                                                    |         | (d) Cohort study—If applicable, explain how loss to follow-up was addressed                                                                                                                       | 10–11            |
|                                                                                                    |         | Case-control study—If applicable, explain how matching of cases and controls was addressed                                                                                                        |                  |
|                                                                                                    |         | Cross-sectional study—If applicable, describe analytical methods taking account of sampling strategy                                                                                              |                  |
| (e) Describe any sensitivity analyses                                                              | 10–11   |                                                                                                                                                                                                   |                  |
| Results                                                                                            |         |                                                                                                                                                                                                   |                  |
| Participants                                                                                       | 13*     | (a) Report numbers of individuals at each stage of study—eg numbers potentially eligible, examined for eligibility, confirmed eligible, included in the study, completing follow-up, and analysed | 12–16            |
|                                                                                                    |         | (b) Give reasons for non-participation at each stage                                                                                                                                              | N/A              |
|                                                                                                    |         | (c) Consider use of a flow diagram                                                                                                                                                                | N/A              |

|                          |     |                                                                                                                                                                                                              |              |
|--------------------------|-----|--------------------------------------------------------------------------------------------------------------------------------------------------------------------------------------------------------------|--------------|
| Descriptive data         | 14* | (a) Give characteristics of study participants (eg demographic, clinical, social) and information on exposures and potential confounders                                                                     | 12–16, 28–31 |
|                          |     | (b) Indicate number of participants with missing data for each variable of interest                                                                                                                          | 38–31        |
|                          |     | (c) <i>Cohort study</i> —Summarise follow-up time (eg, average and total amount)                                                                                                                             | 12           |
| Outcome data             | 15* | <i>Cohort study</i> —Report numbers of outcome events or summary measures over time                                                                                                                          | 12           |
|                          |     | <i>Case-control study</i> —Report numbers in each exposure category, or summary measures of exposure                                                                                                         | N/A          |
|                          |     | <i>Cross-sectional study</i> —Report numbers of outcome events or summary measures                                                                                                                           | N/A          |
| Main results             | 16  | (a) Give unadjusted estimates and, if applicable, confounder-adjusted estimates and their precision (eg, 95% confidence interval). Make clear which confounders were adjusted for and why they were included | 13–16,30,32, |
|                          |     | (b) Report category boundaries when continuous variables were categorized                                                                                                                                    | 12           |
|                          |     | (c) If relevant, consider translating estimates of relative risk into absolute risk for a meaningful time period                                                                                             | 16,32        |
| Other analyses           | 17  | Report other analyses done—eg analyses of subgroups and interactions, and sensitivity analyses                                                                                                               | 16           |
| <b>Discussion</b>        |     |                                                                                                                                                                                                              |              |
| Key results              | 18  | Summarise key results with reference to study objectives                                                                                                                                                     | 17           |
| Limitations              | 19  | Discuss limitations of the study, taking into account sources of potential bias or imprecision. Discuss both direction and magnitude of any potential bias                                                   | 20           |
| Interpretation           | 20  | Give a cautious overall interpretation of results considering objectives, limitations, multiplicity of analyses, results from similar studies, and other relevant evidence                                   | 17–20        |
| Generalisability         | 21  | Discuss the generalisability (external validity) of the study results                                                                                                                                        | 21           |
| <b>Other information</b> |     |                                                                                                                                                                                                              |              |
| Funding                  | 22  | Give the source of funding and the role of the funders for the present study and, if applicable, for the original study on which the present article is based                                                | 23           |

\*Give information separately for cases and controls in case-control studies and, if applicable, for exposed and unexposed groups in cohort and cross-sectional studies. **Note:** An Explanation and Elaboration article discusses each checklist item and gives methodological background and published examples of transparent reporting. The STROBE checklist is best used in conjunction with this article (freely available on the Web sites of PLoS Medicine at <http://www.plosmedicine.org/>, Annals of Internal Medicine at <http://www.annals.org/>, and Epidemiology at <http://www.epidem.com/>). Information on the STROBE Initiative is available at [www.strobe-statement.org](http://www.strobe-statement.org).

Von Elm. E.; Altman, D.G.; Egger, M.; Pocock, S.J.; Gøtzsche, P.C.; Vandenbroucke, J.P.; STROBE Initiative. The Strengthening the Reporting of Observational Studies in Epidemiology (STROBE) statement: guidelines for reporting observational studies. *Lancet* **2007**, *370*, 1453–1457
